# Supplementary material for: Transition metal complexes of a super rigid anthyridine ligand: structural, magnetic and DFT studies
Source: Royal Society of Chemistry journal article supplement (doi:10.1039/c2nj40452d), 2012-01-01
Supplement: c2nj40452d.pdf [file c2nj40452d.pdf]

Electronic Supplementary Information (ESI)

ORTEP drawing of the structures of  $[M_2L_4]^{4+}$  in complexes **2**, **3**, **5** and **6**.

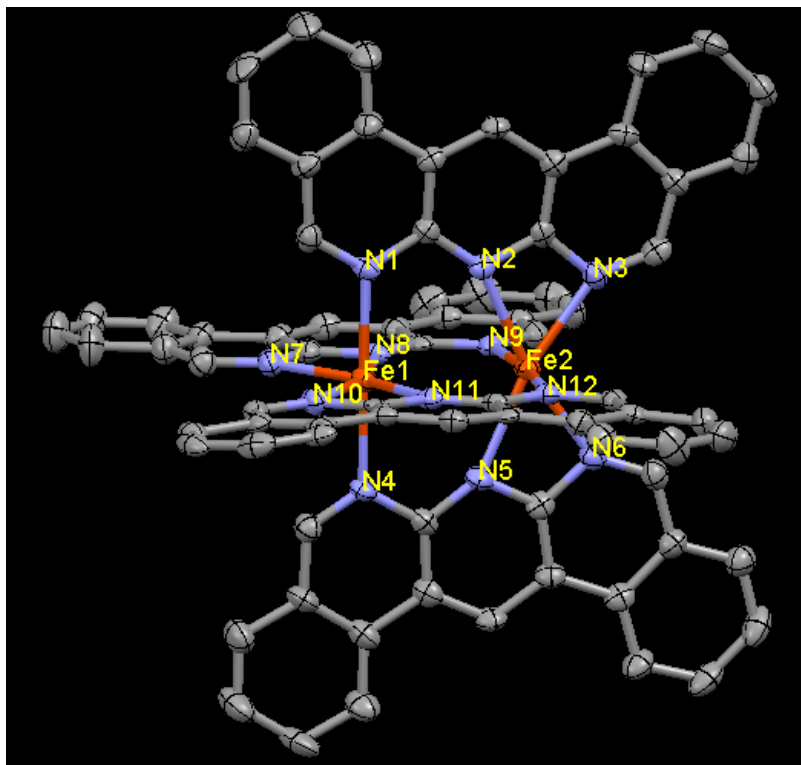

Fig. 1S ORTEP drawing of the structure of  $[M_2L_4]^{4+}$  in **2**. Hydrogen atoms are omitted for clarity. Thermal ellipsoids are drawn at the 30% probability level.

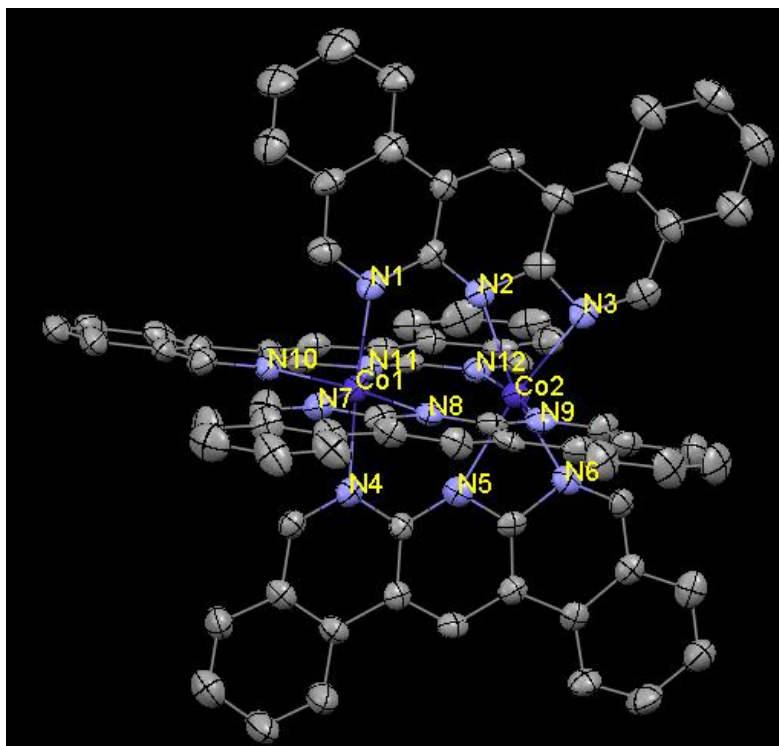

Fig. 2S ORTEP drawing of the structure of  $[M_2L_4]^{4+}$  in **3**. Hydrogen atoms are omitted for clarity. Thermal ellipsoids are drawn at the 30% probability level.

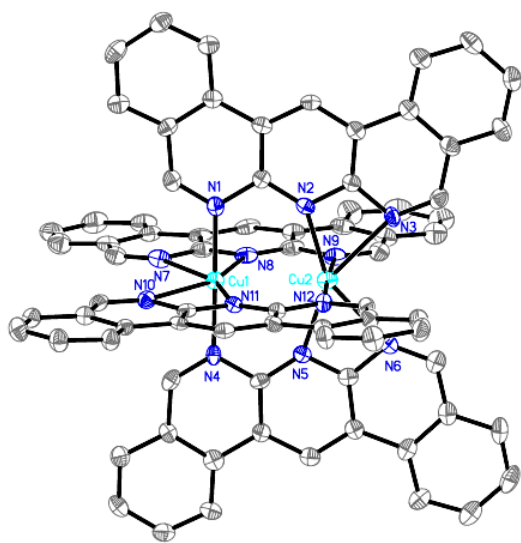

Fig. 3S ORTEP drawing of the structure of  $[M_2L_4]^{4+}$  in **5**. Hydrogen atoms are omitted for clarity.

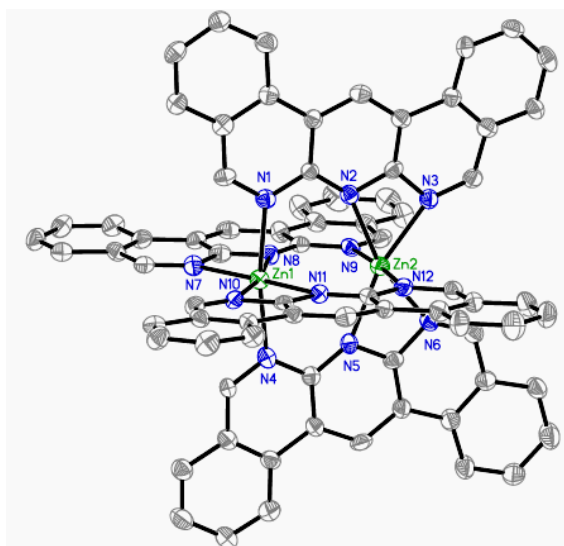

Fig. 4S ORTEP drawing of the structure of  $[M_2L_4]^{4+}$  in **6**. Hydrogen atoms are omitted for clarity.
